# Supplementary material
Source: HighWire-hosted journal article supplement (http://jnis.bmj.com/highwire/filestream/176929/field_highwire_adjunct_files/1/jnis-2023-020299supp002_data_supplement.pdf)
Supplement: jnis-2023-020299supp002_data_supplement.pdf [file jnis-2023-020299supp002_data_supplement.pdf]

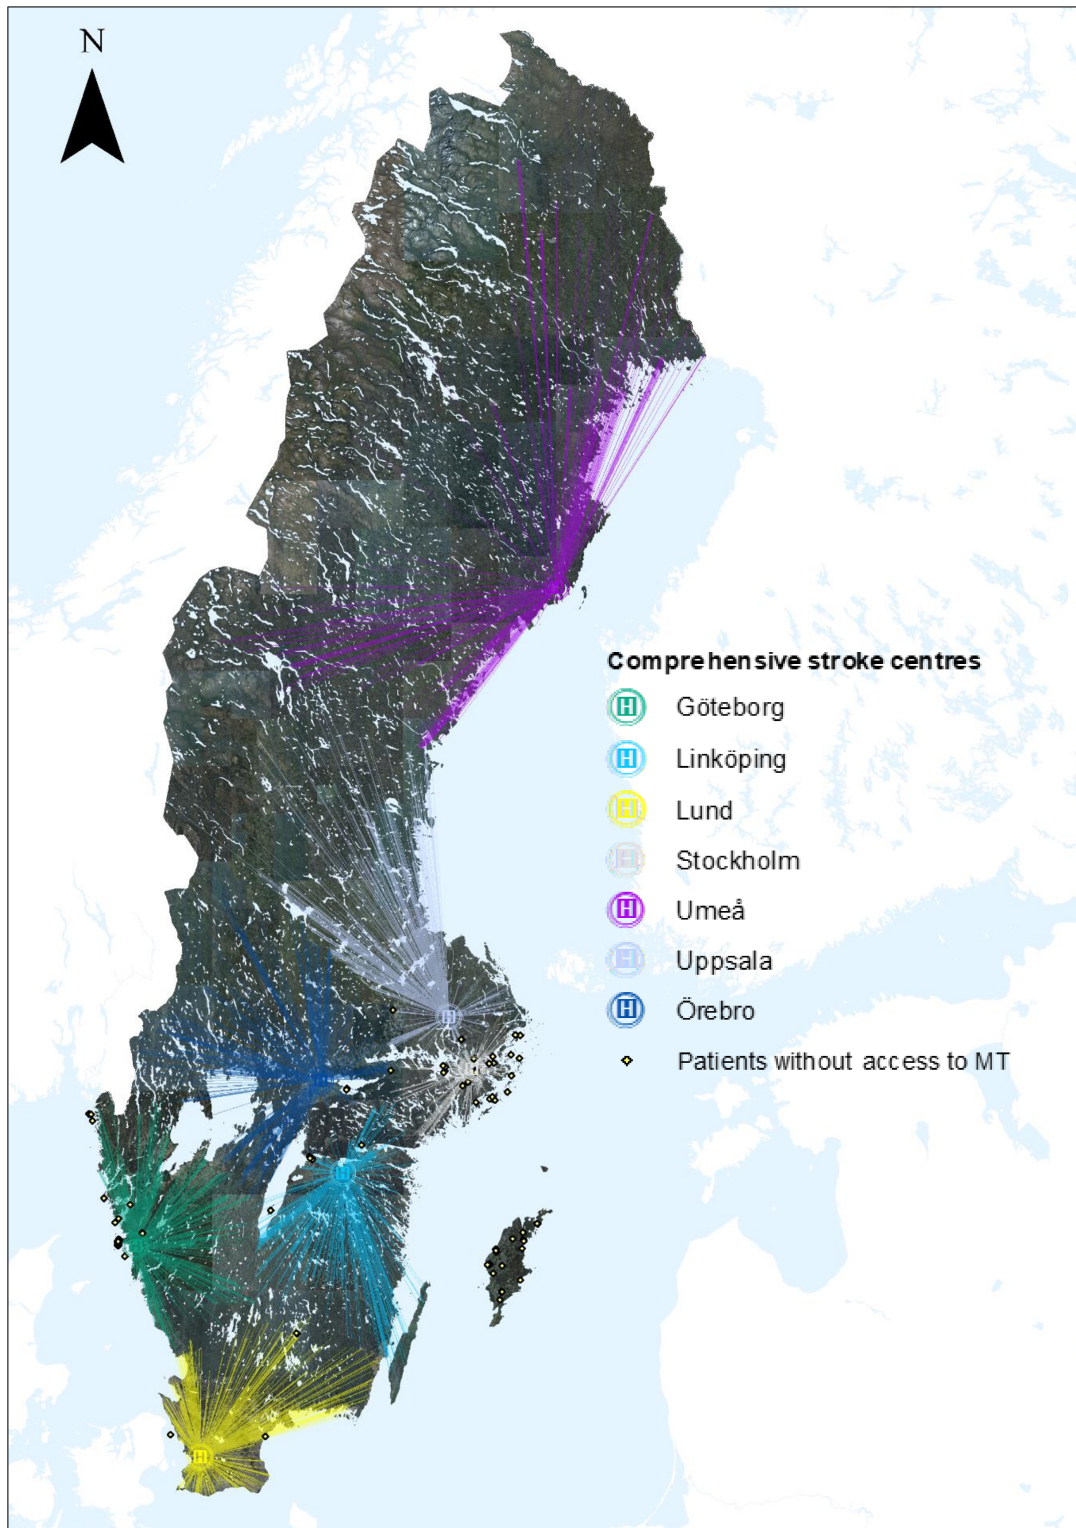

**Figure S1.** Visualised solution to location-allocation problem for seven CSCs. Web map service provided by Region Skåne Web Map Service, WMS server: <https://geodata.skane.se/geoserver/lm/wms?>, access date: Nov. 17<sup>th</sup>, 2021.
